# Supplementary material
Source: PubMed Central journal article supplement (PMC10524580)

Table S1: Missing Covariates and Outcomes

| Missing Covariate/Outcome                                    | % Missing Data |
|--------------------------------------------------------------|----------------|
| <b>Covariates</b>                                            |                |
| Recipient BMI                                                | 0.2%           |
| Recipient estimated glomerular filtration rate at transplant | 0.5%           |
| Ischemic time                                                | 1.4%           |
| Recipient dialysis prior to transplant                       | 0.9%           |
| Recipient cerebrovascular disease                            | 0.8%           |
| Recipient malignancy                                         | 0.2%           |
| Donor inotropic support at procurement                       | 0.3%           |
| <b>In-Hospital Outcomes</b>                                  |                |
| Stroke                                                       | 1.4%           |
| Dialysis                                                     | 1.1%           |
| Permanent pacemaker implant                                  | 0.8%           |

Figure S1: Unadjusted 5-Year Survival Conditional on 30-Day Survival Following Heart Retransplantation

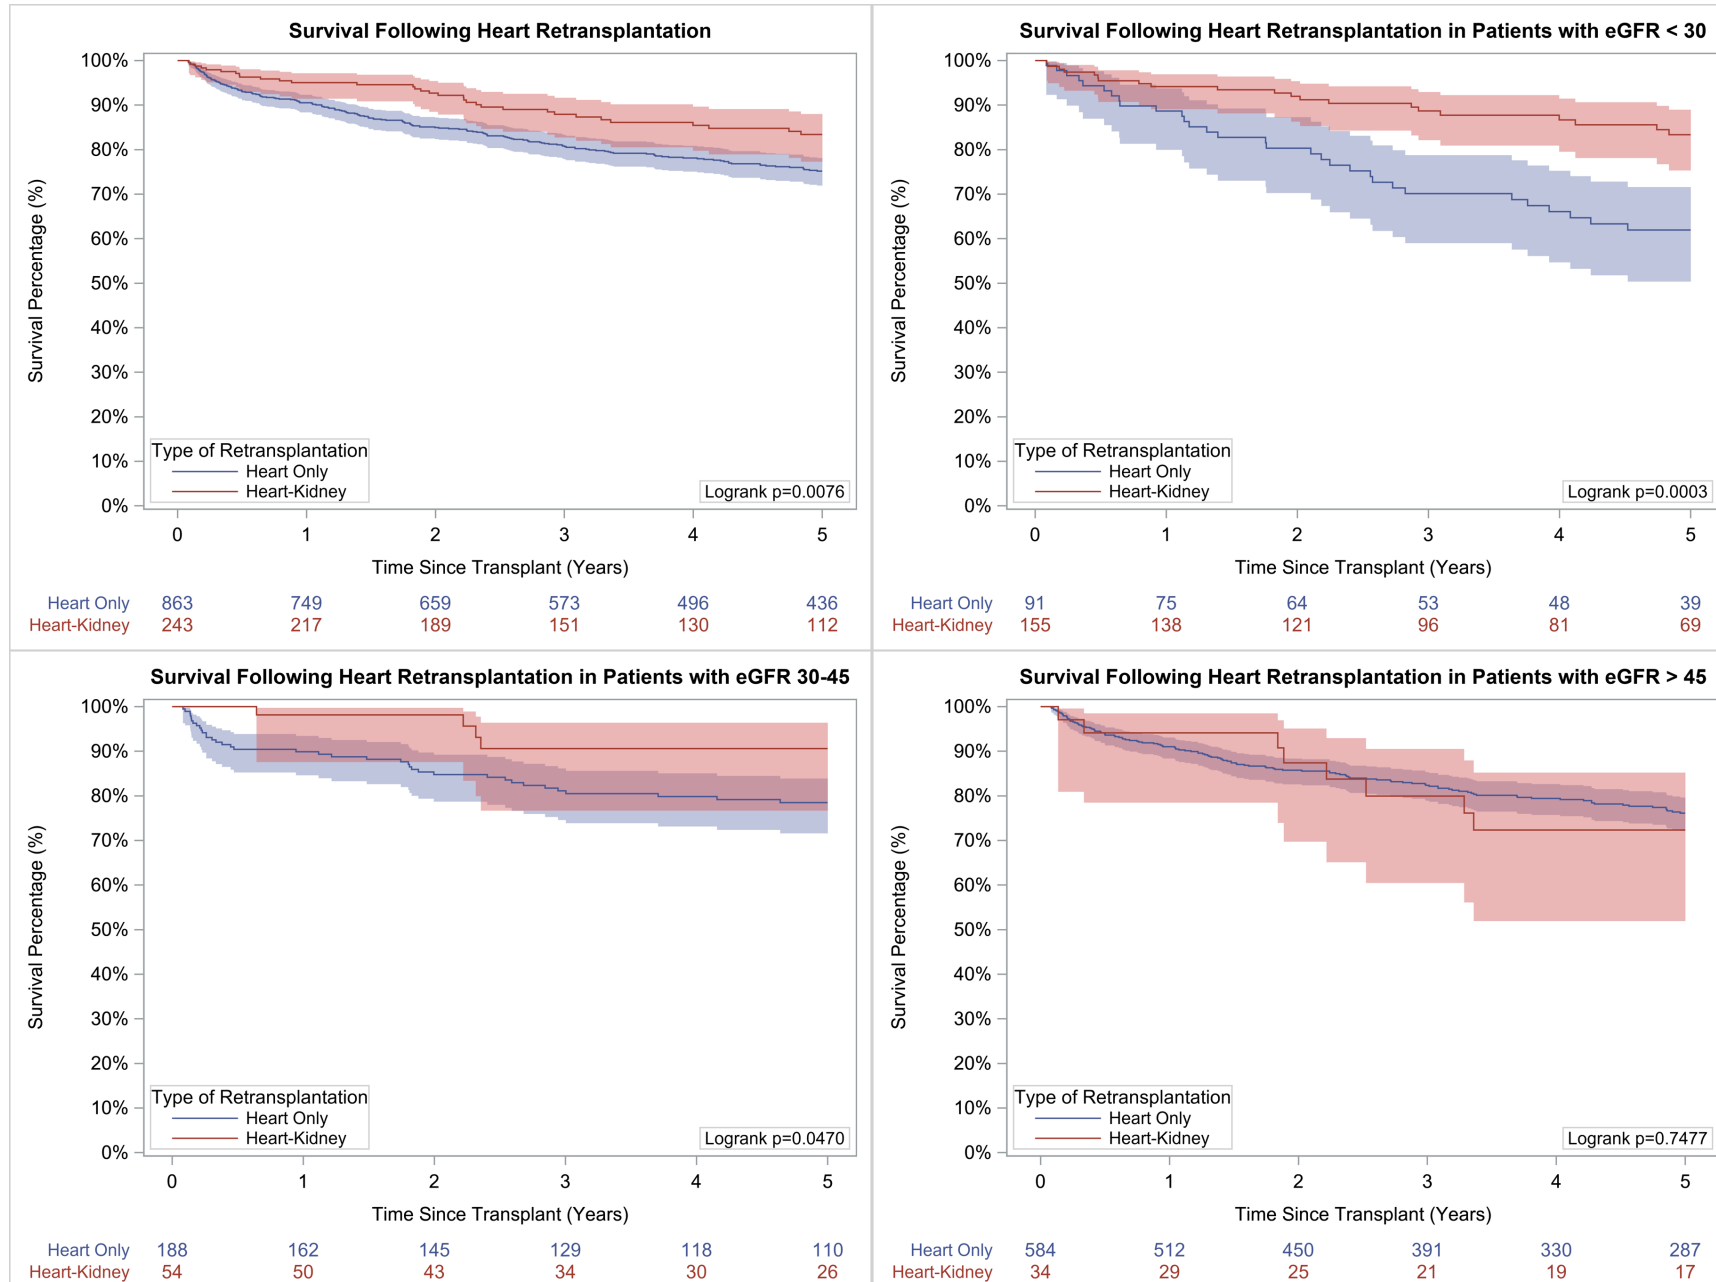

Figure S2: Unadjusted 10-Year Survival Following Heart Retransplantation

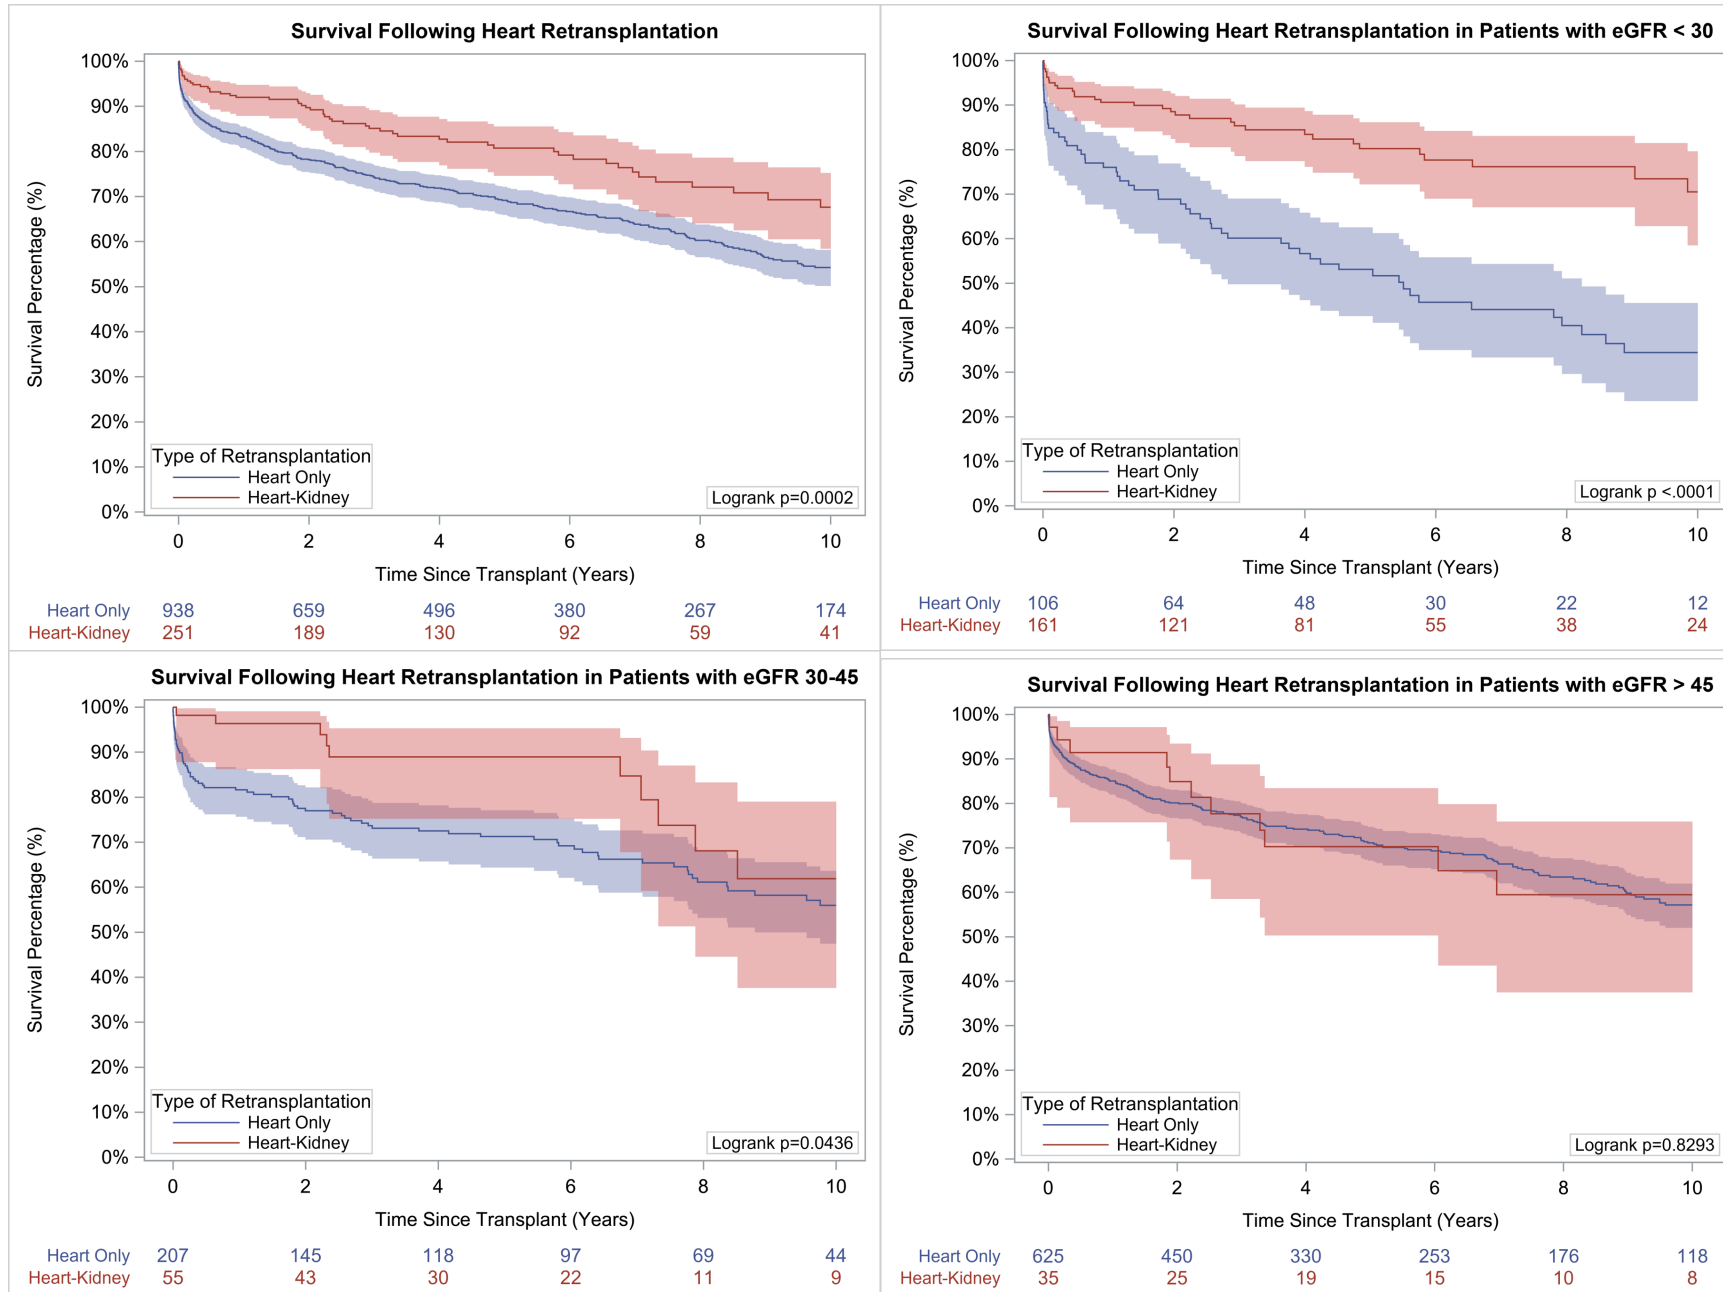

Figure S3: Cumulative Incidence of Chronic Dialysis Dependency in Heart Transplant Recipients with  
 A. eGFR < 30mL/min/1.73m<sup>2</sup>, B. eGFR 30 – 45mL/min/1.73m<sup>2</sup>, C. eGFR > 45mL/min/1.73m<sup>2</sup>

A.

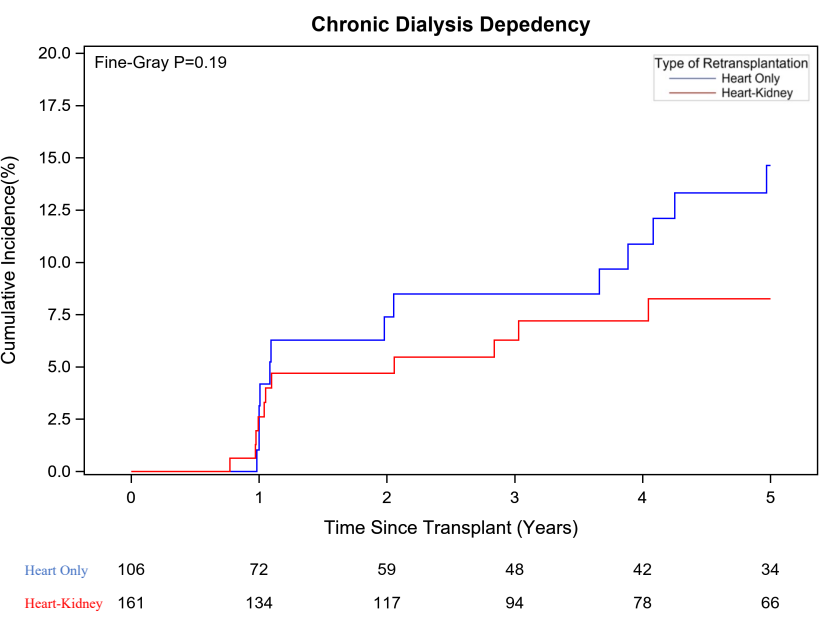

B.

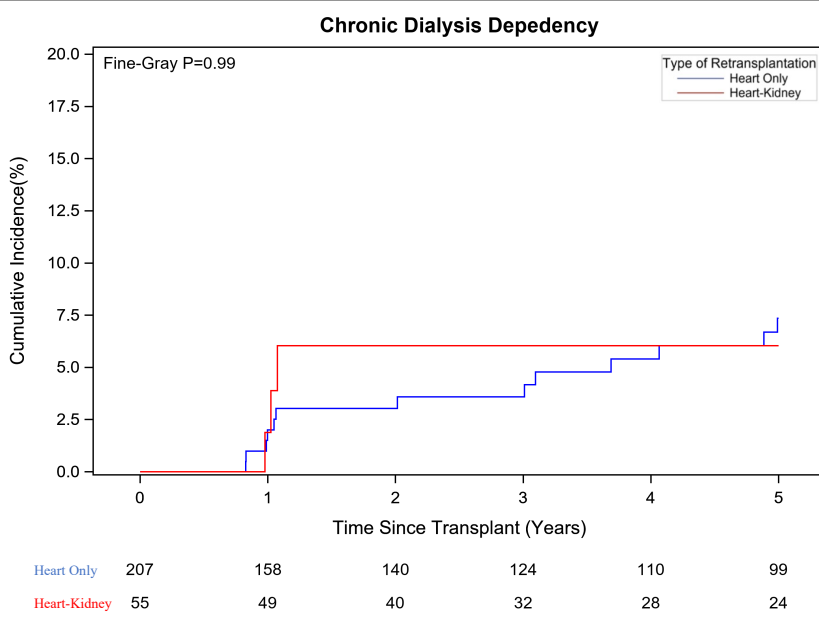

C.

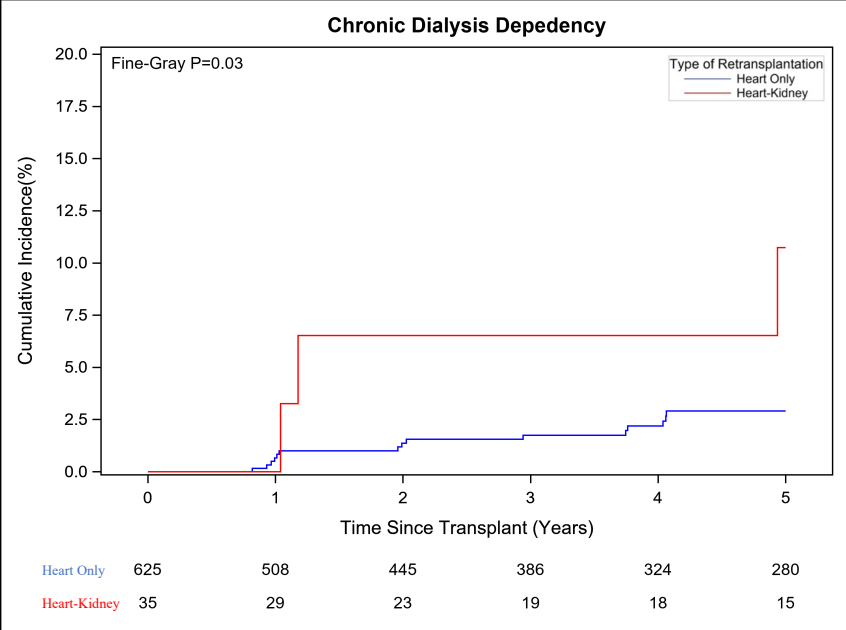

Figure S4: Cumulative Incidence of Subsequent Kidney Waitlist in Heart Retransplant Recipients with  
 A. eGFR < 30mL/min/1.73m<sup>2</sup>, B. eGFR 30 – 45mL/min/1.73m<sup>2</sup>, C. eGFR > 45mL/min/1.73m<sup>2</sup>

A.

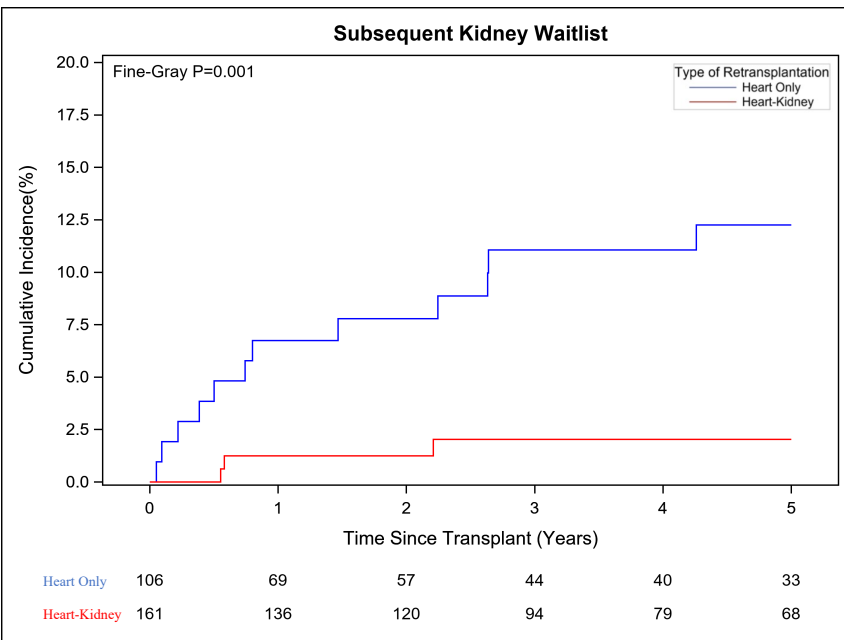

B.

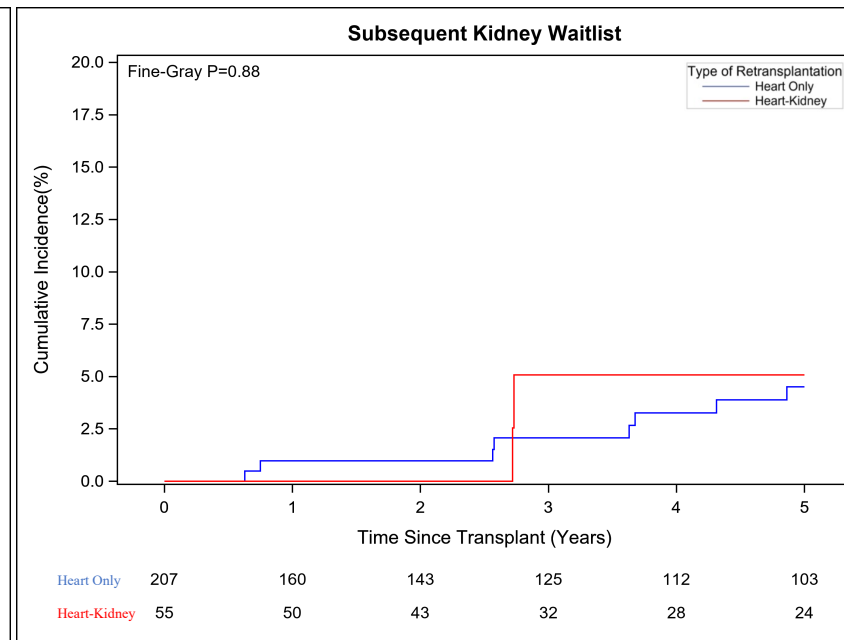

C.

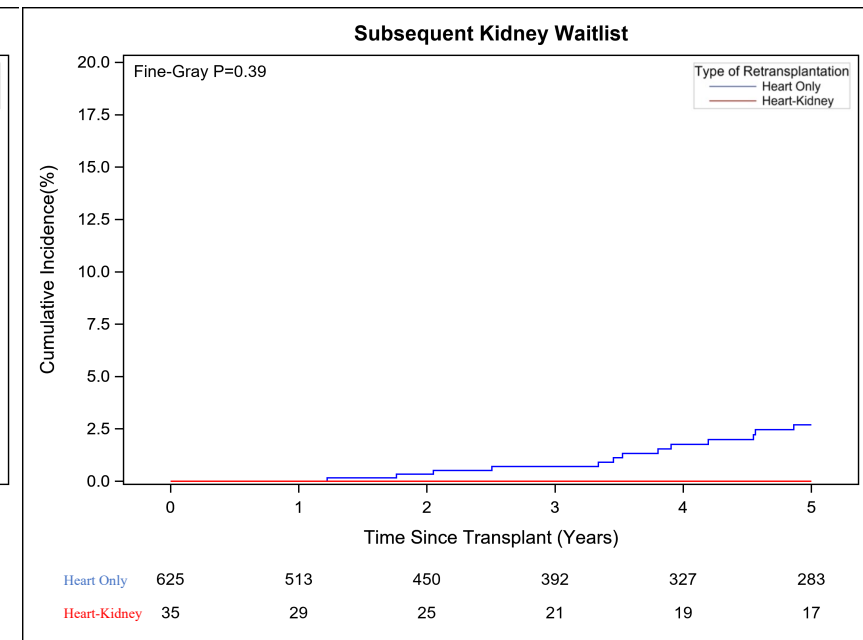

Figure S5: Cumulative Incidence of Subsequent Kidney Transplant in Heart Retransplant Recipients with  
 A. eGFR < 30mL/min/1.73m<sup>2</sup>, B. eGFR 30 – 45mL/min/1.73m<sup>2</sup>, C. eGFR > 45mL/min/1.73m<sup>2</sup>

A.

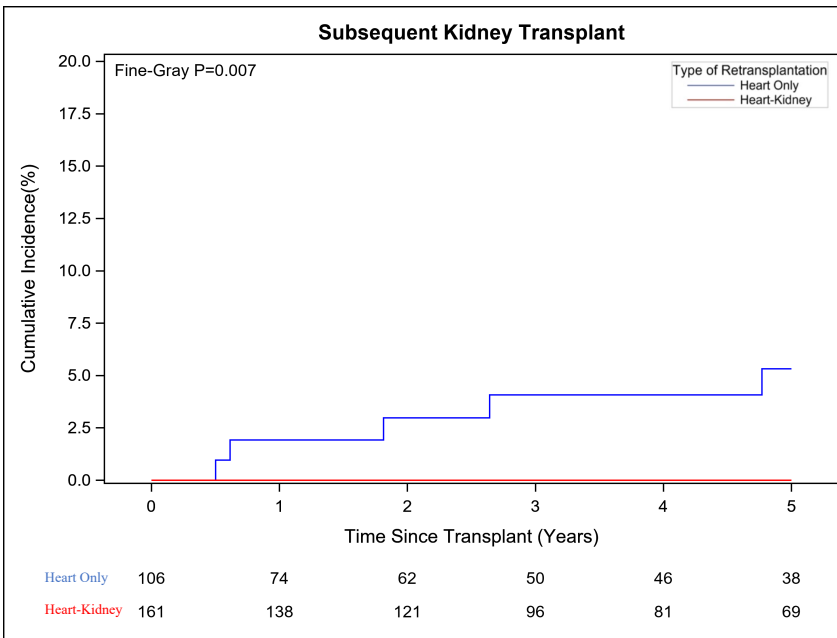

B.

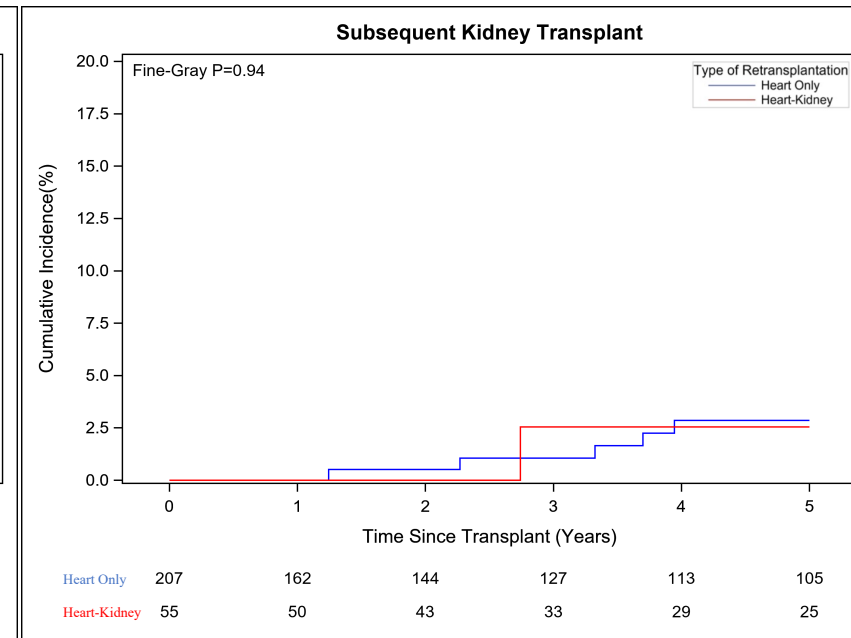

C.

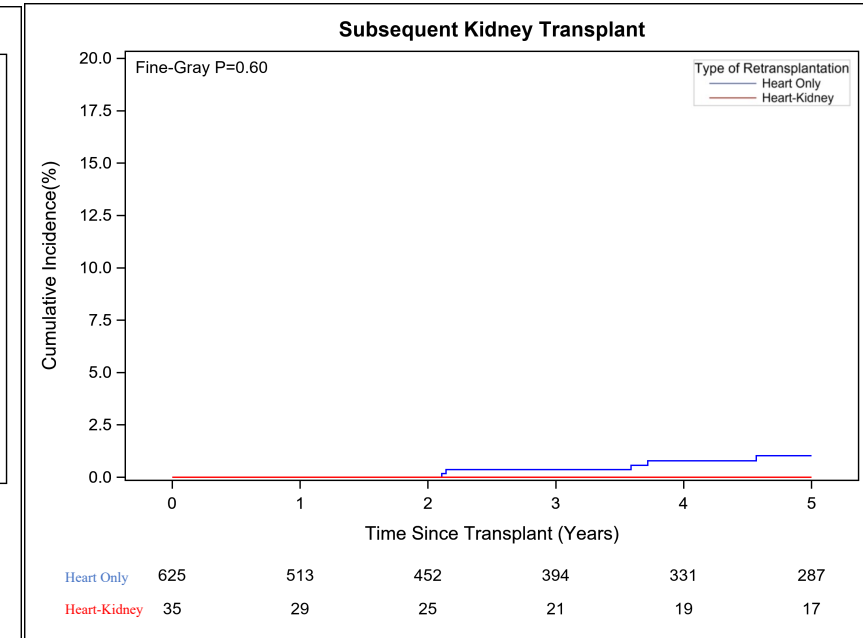

Supplement: NIHMS1894743-supplement-1.pdf [file NIHMS1894743-supplement-1.pdf]
